# Supplementary material for: Beneficial Shifts in the Gut Bacterial Community of Gilthead Seabream (Sparus aurata) Juveniles Supplemented with Allium-Derived Compound Propyl Propane Thiosulfonate (PTSO)
Source: MDPI journal article supplement (doi:10.3390/ani12141821), 2022-07-17
Supplement: s1 [file s1]

Archive with 2 entries (2 files):
- Microbiota Bream Animals Supplementary Material.pdf
- Table S1.xlsx
