# Supplementary material for: Beneficial Shifts in the Gut Bacterial Community of Gilthead Seabream (Sparus aurata) Juveniles Supplemented with Allium-Derived Compound Propyl Propane Thiosulfonate (PTSO)
Source: MDPI journal article supplement (doi:10.3390/ani12141821), 2022-07-17
Supplement: s1 [file s1 › Microbiota Bream Animals Supplementary Material.pdf]

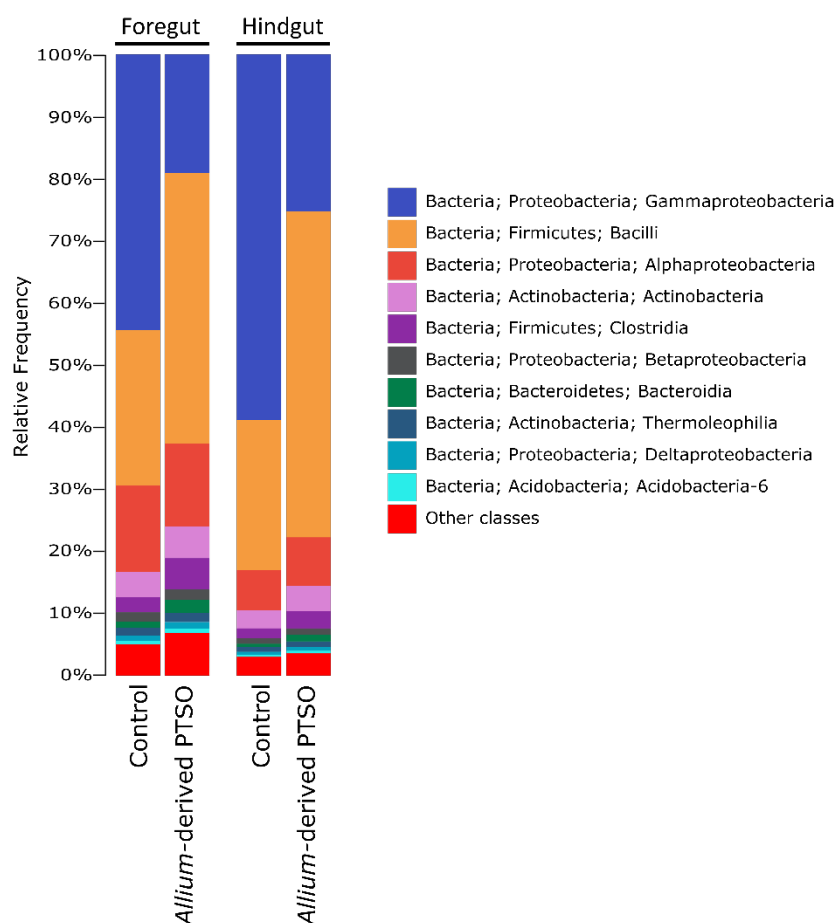

**Supplementary Figure S1.** Barplot summarizing the relative bacterial abundance at the class level in different gut regions (foregut and hindgut) and treatments. Control refers to juvenile gilthead seabream fed with basal diet while *Allium*-derived PTSO refers to experimental juvenile gilthead seabream fed with basal diet supplemented with *Allium*-derived PTSO.

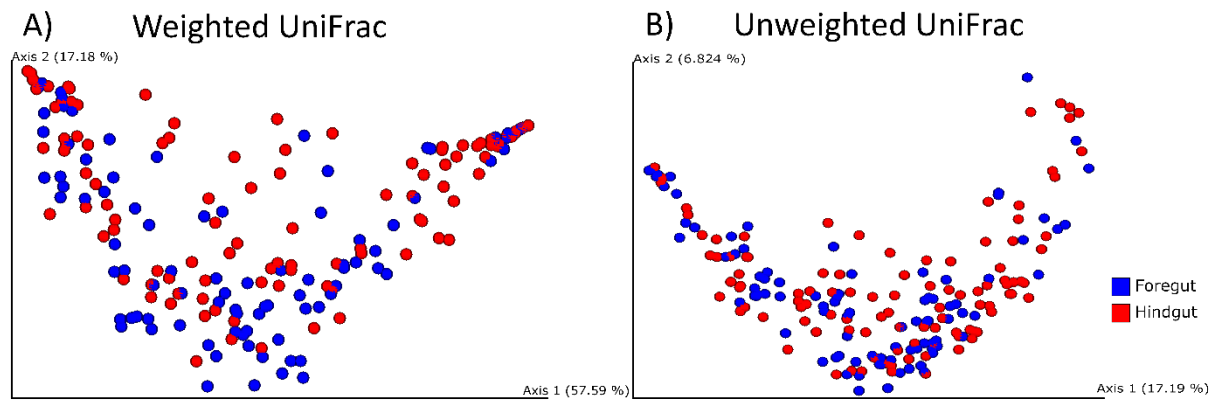

**Supplementary Figure S2.** Principal Coordinate Analysis based in Weighted UniFrac (A) and Unweighted UniFrac (B) distance matrixes exploring differences in bacterial community between both gut regions (blue: foregut, red: hindgut). Percentages show the proportion of variance explained by each axis.

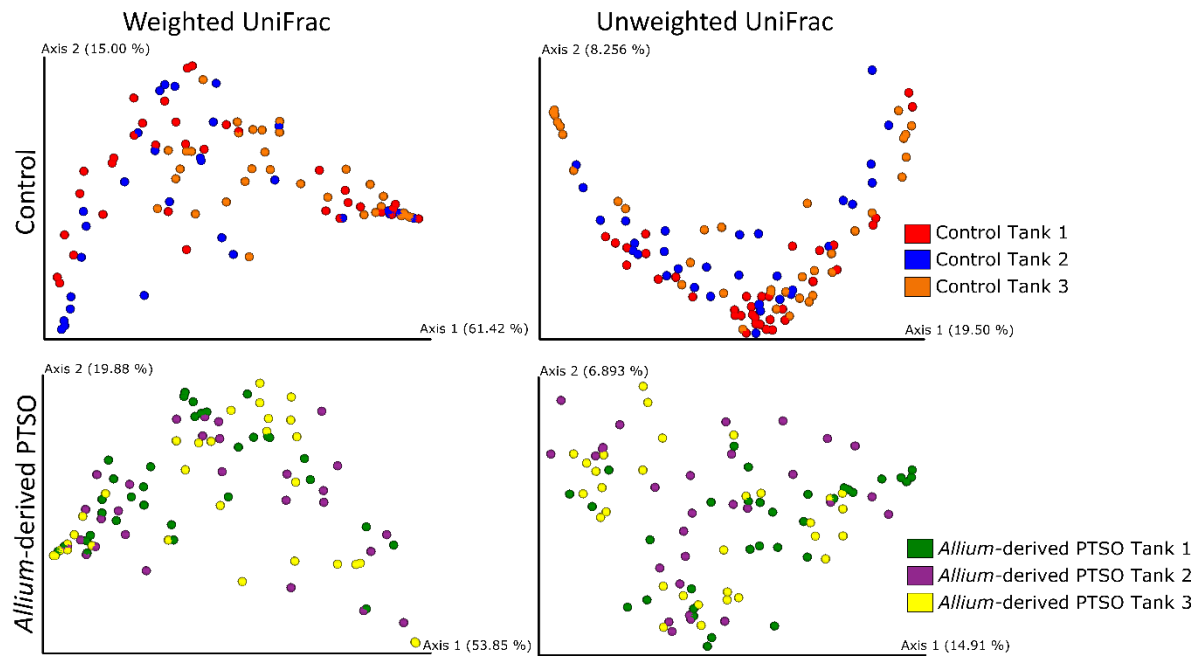

**Supplementary Figure S3.** Principal Coordinate Analysis based in Weighted UniFrac and Unweighted UniFrac distance matrixes exploring differences in bacterial gut community among different tanks of control and *Allium*-derived PTSO (red: control, tank 1, blue: control, tank 2, orange: control, tank 3, green: *Allium*-derived PTSO, tank 1, purple: *Allium*-derived PTSO, tank 2, yellow: *Allium*-derived PTSO, tank 3). Percentages show the proportion of variance explained by each axis.
