# Supplementary material for: Beneficial Shifts in the Gut Bacterial Community of Gilthead Seabream (Sparus aurata) Juveniles Supplemented with Allium-Derived Compound Propyl Propane Thiosulfonate (PTSO)
Source: MDPI journal article supplement (doi:10.3390/ani12141821), 2022-07-17
Supplement: s1 [file s1 › Table S1.xlsx]

## Sheet: Hoja1
Sample ID	Tank	Treatment	Gut_Section	Linker Primers 1st PCR	Barcode N70X	Barcode N70X Sequence	Barcode S50X	Barcode S50X Sequence
C.1.1.F	C.1	Control	Foregut	U515 x E786	N707	CTCTCTAC	S501	TAGATCGC
C.1.1.F2	C.1	Control	Foregut	U515_bar2 x E786	N709	GCTACGCT	S507	AAGGAGTA
C.1.1.H	C.1	Control	Hindgut	U515 x E786	N707	CTCTCTAC	S504	AGAGTAGA
C.1.2.F	C.1	Control	Foregut	U515 x E786	N707	CTCTCTAC	S505	GTAAGGAG
C.1.2.H	C.1	Control	Hindgut	U515 x E786	N707	CTCTCTAC	S508	CTAAGCCT
C.1.3.F	C.1	Control	Foregut	U515 x E786	N708	CAGAGAGG	S501	TAGATCGC
C.1.3.F2	C.1	Control	Foregut	U515_bar2 x E786	N709	GCTACGCT	S508	CTAAGCCT
C.1.4.F	C.1	Control	Foregut	U515 x E786	N701	TAAGGCGA	S501	TAGATCGC
C.1.4.H	C.1	Control	Hindgut	U515 x E786	N708	CAGAGAGG	S508	CTAAGCCT
C.1.5.F	C.1	Control	Foregut	U515 x E786	N709	GCTACGCT	S501	TAGATCGC
C.1.5.H	C.1	Control	Hindgut	U515 x E786	N709	GCTACGCT	S504	AGAGTAGA
C.1.6.F	C.1	Control	Foregut	U515 x E786	N709	GCTACGCT	S505	GTAAGGAG
C.1.6.H	C.1	Control	Hindgut	U515 x E786	N709	GCTACGCT	S508	CTAAGCCT
C.1.7.F	C.1	Control	Foregut	U515 x E786	N701	TAAGGCGA	S502	CTCTCTAT
C.1.7.H	C.1	Control	Hindgut	U515_bar2 x E786	N710	CGAGGCTG	S504	AGAGTAGA
C.1.7.H2	C.1	Control	Hindgut	U515_bar2 x E786	N710	CGAGGCTG	S501	TAGATCGC
C.1.8.F	C.1	Control	Foregut	U515_bar2 x E786	N710	CGAGGCTG	S505	GTAAGGAG
C.1.8.H	C.1	Control	Hindgut	U515_bar2 x E786	N710	CGAGGCTG	S506	ACTGCATA
C.1.9.F	C.1	Control	Foregut	U515_bar2 x E786	N711	AAGAGGCA	S504	AGAGTAGA
C.1.9.F2	C.1	Control	Foregut	U515_bar2 x E786	N710	CGAGGCTG	S502	CTCTCTAT
C.1.9.H	C.1	Control	Hindgut	U515 x E786	N701	TAAGGCGA	S503	TATCCTCT
C.1.10.F	C.1	Control	Foregut	U515 x E786	N701	TAAGGCGA	S504	AGAGTAGA
C.1.10.H	C.1	Control	Hindgut	U515 x E786	N701	TAAGGCGA	S505	GTAAGGAG
C.1.11.F	C.1	Control	Foregut	U515 x E786	N701	TAAGGCGA	S506	ACTGCATA
C.1.11.H	C.1	Control	Hindgut	U515 x E786	N701	TAAGGCGA	S507	AAGGAGTA
C.1.12.F	C.1	Control	Foregut	U515 x E786	N701	TAAGGCGA	S508	CTAAGCCT
C.1.12.H	C.1	Control	Hindgut	U515 x E786	N702	CGTACTAG	S501	TAGATCGC
C.1.13.F	C.1	Control	Foregut	U515 x E786	N702	CGTACTAG	S502	CTCTCTAT
C.1.13.H	C.1	Control	Hindgut	U515 x E786	N706	TAGGCATG	S506	ACTGCATA
C.1.14.F	C.1	Control	Foregut	U515 x E786	N706	TAGGCATG	S507	AAGGAGTA
C.1.14.H	C.1	Control	Hindgut	U515 x E786	N706	TAGGCATG	S508	CTAAGCCT
C.1.15.F	C.1	Control	Foregut	U515 x E786	N707	CTCTCTAC	S501	TAGATCGC
C.1.15.H	C.1	Control	Hindgut	U515 x E786	N707	CTCTCTAC	S502	CTCTCTAT
C.1.16.F	C.1	Control	Foregut	U515 x E786	N707	CTCTCTAC	S503	TATCCTCT
C.1.16.H	C.1	Control	Hindgut	U515 x E786	N701	TAAGGCGA	S503	TATCCTCT
C.1.17.F	C.1	Control	Foregut	U515 x E786	N702	CGTACTAG	S503	TATCCTCT
C.1.17.H	C.1	Control	Hindgut	U515 x E786	N701	TAAGGCGA	S504	AGAGTAGA
C.1.18.F	C.1	Control	Foregut	U515 x E786	N702	CGTACTAG	S504	AGAGTAGA
C.1.18.H	C.1	Control	Hindgut	U515 x E786	N702	CGTACTAG	S505	GTAAGGAG
C.1.19.F	C.1	Control	Foregut	U515 x E786	N702	CGTACTAG	S506	ACTGCATA
C.1.19.H	C.1	Control	Hindgut	U515 x E786	N702	CGTACTAG	S507	AAGGAGTA
C.1.20.F	C.1	Control	Foregut	U515 x E786	N702	CGTACTAG	S508	CTAAGCCT
C.1.20.H	C.1	Control	Hindgut	U515 x E786	N703	AGGCAGAA	S501	TAGATCGC
C.2.1.F	C.2	Control	Foregut	U515 x E786	N703	AGGCAGAA	S502	CTCTCTAT
C.2.1.H	C.2	Control	Hindgut	U515 x E786	N703	AGGCAGAA	S503	TATCCTCT
C.2.2.F	C.2	Control	Foregut	U515 x E786	N703	AGGCAGAA	S504	AGAGTAGA
C.2.2.H	C.2	Control	Hindgut	U515 x E786	N702	CGTACTAG	S505	GTAAGGAG
C.2.3.H	C.2	Control	Hindgut	U515 x E786	N702	CGTACTAG	S507	AAGGAGTA
C.2.4.F	C.2	Control	Foregut	U515 x E786	N702	CGTACTAG	S508	CTAAGCCT
C.2.4.H	C.2	Control	Hindgut	U515 x E786	N703	AGGCAGAA	S503	TATCCTCT
C.2.5.F	C.2	Control	Foregut	U515 x E786	N703	AGGCAGAA	S505	GTAAGGAG
C.2.5.H	C.2	Control	Hindgut	U515 x E786	N703	AGGCAGAA	S506	ACTGCATA
C.2.6.F	C.2	Control	Foregut	U515 x E786	N703	AGGCAGAA	S506	ACTGCATA
C.2.6.H	C.2	Control	Hindgut	U515 x E786	N703	AGGCAGAA	S507	AAGGAGTA
C.2.7.F	C.2	Control	Foregut	U515 x E786	N703	AGGCAGAA	S508	CTAAGCCT
C.2.7.H	C.2	Control	Hindgut	U515 x E786	N704	TCCTGAGC	S501	TAGATCGC
C.2.8.F	C.2	Control	Foregut	U515_bar2 x E786	N701	TAAGGCGA	S505	GTAAGGAG
C.2.8.F2	C.2	Control	Foregut	U515_bar2 x E786	N710	CGAGGCTG	S503	TATCCTCT
C.2.8.H	C.2	Control	Hindgut	U515_bar2 x E786	N701	TAAGGCGA	S508	CTAAGCCT
C.2.9.H	C.2	Control	Hindgut	U515 x E786	N704	TCCTGAGC	S502	CTCTCTAT
C.2.10.F	C.2	Control	Foregut	U515 x E786	N707	CTCTCTAC	S504	AGAGTAGA
C.2.10.H	C.2	Control	Hindgut	U515 x E786	N707	CTCTCTAC	S505	GTAAGGAG
C.2.11.F	C.2	Control	Foregut	U515_bar2 x E786	N701	TAAGGCGA	S501	TAGATCGC
C.2.11.H	C.2	Control	Hindgut	U515_bar2 x E786	N701	TAAGGCGA	S502	CTCTCTAT
C.2.12.F	C.2	Control	Foregut	U515_bar2 x E786	N701	TAAGGCGA	S503	TATCCTCT
C.2.12.H	C.2	Control	Hindgut	U515_bar2 x E786	N701	TAAGGCGA	S504	AGAGTAGA
C.2.13.F	C.2	Control	Foregut	U515_bar2 x E786	N701	TAAGGCGA	S505	GTAAGGAG
C.2.13.H	C.2	Control	Hindgut	U515_bar2 x E786	N701	TAAGGCGA	S506	ACTGCATA
C.2.14.F	C.2	Control	Foregut	U515_bar2 x E786	N701	TAAGGCGA	S507	AAGGAGTA
C.2.14.H	C.2	Control	Hindgut	U515_bar2 x E786	N701	TAAGGCGA	S508	CTAAGCCT
C.2.15.F	C.2	Control	Foregut	U515_bar2 x E786	N702	CGTACTAG	S501	TAGATCGC
C.2.15.H	C.2	Control	Hindgut	U515_bar2 x E786	N702	CGTACTAG	S502	CTCTCTAT
C.2.16.F	C.2	Control	Foregut	U515_bar2 x E786	N702	CGTACTAG	S503	TATCCTCT
C.2.16.H	C.2	Control	Hindgut	U515_bar2 x E786	N702	CGTACTAG	S504	AGAGTAGA
C.2.17.F	C.2	Control	Foregut	U515_bar2 x E786	N702	CGTACTAG	S505	GTAAGGAG
C.2.17.H	C.2	Control	Hindgut	U515_bar2 x E786	N702	CGTACTAG	S508	CTAAGCCT
C.2.18.F	C.2	Control	Foregut	U515_bar2 x E786	N702	CGTACTAG	S505	GTAAGGAG
C.2.18.H	C.2	Control	Hindgut	U515_bar2 x E786	N702	CGTACTAG	S506	ACTGCATA
C.2.19.F	C.2	Control	Foregut	U515_bar2 x E786	N702	CGTACTAG	S507	AAGGAGTA
C.2.19.H	C.2	Control	Hindgut	U515 x E786	N707	CTCTCTAC	S506	ACTGCATA
C.2.20.F	C.2	Control	Foregut	U515_bar2 x E786	N703	AGGCAGAA	S505	GTAAGGAG
C.2.20.H	C.2	Control	Hindgut	U515_bar2 x E786	N703	AGGCAGAA	S508	CTAAGCCT
C.3.1.F	C.3	Control	Foregut	U515_bar2 x E786	N704	TCCTGAGC	S505	GTAAGGAG
C.3.1.F2	C.3	Control	Foregut	U515_bar2 x E786	N710	CGAGGCTG	S504	AGAGTAGA
C.3.1.H	C.3	Control	Hindgut	U515_bar2 x E786	N704	TCCTGAGC	S508	CTAAGCCT
C.3.2.F	C.3	Control	Foregut	U515_bar2 x E786	N705	GGACTCCT	S505	GTAAGGAG
C.3.2.F2	C.3	Control	Foregut	U515_bar2 x E786	N710	CGAGGCTG	S505	GTAAGGAG
C.3.2.H	C.3	Control	Hindgut	U515_bar2 x E786	N705	GGACTCCT	S508	CTAAGCCT
C.3.3.F	C.3	Control	Foregut	U515_bar2 x E786	N706	TAGGCATG	S505	GTAAGGAG
C.3.3.H	C.3	Control	Hindgut	U515_bar2 x E786	N706	TAGGCATG	S508	CTAAGCCT
C.3.4.F	C.3	Control	Foregut	U515_bar2 x E786	N707	CTCTCTAC	S505	GTAAGGAG
C.3.4.H	C.3	Control	Hindgut	U515_bar2 x E786	N707	CTCTCTAC	S508	CTAAGCCT
C.3.5.F	C.3	Control	Foregut	U515_bar2 x E786	N708	CAGAGAGG	S505	GTAAGGAG
C.3.5.H	C.3	Control	Hindgut	U515_bar2 x E786	N708	CAGAGAGG	S508	CTAAGCCT
C.3.6.F	C.3	Control	Foregut	U515 x E786	N707	CTCTCTAC	S507	AAGGAGTA
C.3.6.H	C.3	Control	Hindgut	U515 x E786	N707	CTCTCTAC	S508	CTAAGCCT
C.3.7.F	C.3	Control	Foregut	U515 x E786	N708	CAGAGAGG	S501	TAGATCGC
C.3.7.H	C.3	Control	Hindgut	U515 x E786	N708	CAGAGAGG	S502	CTCTCTAT
C.3.8.F	C.3	Control	Foregut	U515 x E786	N708	CAGAGAGG	S503	TATCCTCT
C.3.8.H	C.3	Control	Hindgut	U515 x E786	N708	CAGAGAGG	S504	AGAGTAGA
C.3.9.F	C.3	Control	Foregut	U515 x E786	N708	CAGAGAGG	S505	GTAAGGAG
C.3.9.H	C.3	Control	Hindgut	U515 x E786	N708	CAGAGAGG	S506	ACTGCATA
C.3.10.F	C.3	Control	Foregut	U515 x E786	N708	CAGAGAGG	S507	AAGGAGTA
C.3.10.H	C.3	Control	Hindgut	U515 x E786	N708	CAGAGAGG	S508	CTAAGCCT
C.3.11.F	C.3	Control	Foregut	U515_bar2 x E786	N702	CGTACTAG	S508	CTAAGCCT
C.3.11.H	C.3	Control	Hindgut	U515_bar2 x E786	N703	AGGCAGAA	S501	TAGATCGC
C.3.12.F	C.3	Control	Foregut	U515_bar2 x E786	N703	AGGCAGAA	S502	CTCTCTAT
C.3.12.H	C.3	Control	Hindgut	U515_bar2 x E786	N703	AGGCAGAA	S503	TATCCTCT
C.3.13.F	C.3	Control	Foregut	U515_bar2 x E786	N703	AGGCAGAA	S504	AGAGTAGA
C.3.13.H	C.3	Control	Hindgut	U515_bar2 x E786	N703	AGGCAGAA	S505	GTAAGGAG
C.3.14.F	C.3	Control	Foregut	U515_bar2 x E786	N703	AGGCAGAA	S506	ACTGCATA
C.3.14.H	C.3	Control	Hindgut	U515_bar2 x E786	N703	AGGCAGAA	S507	AAGGAGTA
C.3.15.F	C.3	Control	Foregut	U515_bar2 x E786	N703	AGGCAGAA	S508	CTAAGCCT
C.3.15.H	C.3	Control	Hindgut	U515_bar2 x E786	N704	TCCTGAGC	S501	TAGATCGC
C.3.16.F	C.3	Control	Foregut	U515_bar2 x E786	N704	TCCTGAGC	S502	CTCTCTAT
C.3.16.H	C.3	Control	Hindgut	U515_bar2 x E786	N704	TCCTGAGC	S503	TATCCTCT
C.3.17.F	C.3	Control	Foregut	U515_bar2 x E786	N709	GCTACGCT	S505	GTAAGGAG
C.3.17.F2	C.3	Control	Foregut	U515_bar2 x E786	N710	CGAGGCTG	S506	ACTGCATA
C.3.17.H	C.3	Control	Hindgut	U515_bar2 x E786	N709	GCTACGCT	S504	AGAGTAGA
C.3.18.F	C.3	Control	Foregut	U515_bar2 x E786	N704	TCCTGAGC	S504	AGAGTAGA
C.3.18.H	C.3	Control	Hindgut	U515_bar2 x E786	N704	TCCTGAGC	S505	GTAAGGAG
C.3.19.F	C.3	Control	Foregut	U515_bar2 x E786	N704	TCCTGAGC	S506	ACTGCATA
C.3.19.H	C.3	Control	Hindgut	U515_bar2 x E786	N704	TCCTGAGC	S507	AAGGAGTA
C.3.20.F	C.3	Control	Foregut	U515_bar2 x E786	N704	TCCTGAGC	S508	CTAAGCCT
C.3.20.H	C.3	Control	Hindgut	U515_bar2 x E786	N705	GGACTCCT	S501	TAGATCGC
AE.1.1.F	T.1	Allium-derived PTSO	Foregut	U515_bar2 x E786	N705	GGACTCCT	S502	CTCTCTAT
AE.1.1.H	T.1	Allium-derived PTSO	Hindgut	U515_bar2 x E786	N705	GGACTCCT	S503	TATCCTCT
AE.1.2.F	T.1	Allium-derived PTSO	Foregut	U515_bar2 x E786	N705	GGACTCCT	S504	AGAGTAGA
AE.1.2.H	T.1	Allium-derived PTSO	Hindgut	U515_bar2 x E786	N705	GGACTCCT	S505	GTAAGGAG
AE.1.3.F	T.1	Allium-derived PTSO	Foregut	U515_bar2 x E786	N705	GGACTCCT	S506	ACTGCATA
AE.1.3.H	T.1	Allium-derived PTSO	Hindgut	U515_bar2 x E786	N705	GGACTCCT	S507	AAGGAGTA
AE.1.4.F	T.1	Allium-derived PTSO	Foregut	U515_bar2 x E786	N705	GGACTCCT	S508	CTAAGCCT
AE.1.4.H	T.1	Allium-derived PTSO	Hindgut	U515_bar2 x E786	N706	TAGGCATG	S501	TAGATCGC
AE.1.5.F	T.1	Allium-derived PTSO	Foregut	U515 x E786	N703	AGGCAGAA	S507	AAGGAGTA
AE.1.6.H	T.1	Allium-derived PTSO	Hindgut	U515 x E786	N704	TCCTGAGC	S505	GTAAGGAG
AE.1.7.F	T.1	Allium-derived PTSO	Foregut	U515_bar2 x E786	N706	TAGGCATG	S502	CTCTCTAT
AE.1.7.H	T.1	Allium-derived PTSO	Hindgut	U515_bar2 x E786	N706	TAGGCATG	S503	TATCCTCT
AE.1.8.F	T.1	Allium-derived PTSO	Foregut	U515_bar2 x E786	N706	TAGGCATG	S504	AGAGTAGA
AE.1.8.H	T.1	Allium-derived PTSO	Hindgut	U515_bar2 x E786	N706	TAGGCATG	S505	GTAAGGAG
AE.1.9.F	T.1	Allium-derived PTSO	Foregut	U515_bar2 x E786	N706	TAGGCATG	S506	ACTGCATA
AE.1.9.H	T.1	Allium-derived PTSO	Hindgut	U515_bar2 x E786	N706	TAGGCATG	S507	AAGGAGTA
AE.1.10.F	T.1	Allium-derived PTSO	Foregut	U515 x E786	N709	GCTACGCT	S501	TAGATCGC
AE.1.10.H	T.1	Allium-derived PTSO	Hindgut	U515 x E786	N709	GCTACGCT	S502	CTCTCTAT
AE.1.11.F	T.1	Allium-derived PTSO	Foregut	U515 x E786	N709	GCTACGCT	S503	TATCCTCT
AE.1.11.H	T.1	Allium-derived PTSO	Hindgut	U515 x E786	N709	GCTACGCT	S504	AGAGTAGA
AE.1.12.F	T.1	Allium-derived PTSO	Foregut	U515 x E786	N709	GCTACGCT	S505	GTAAGGAG
AE.1.12.H	T.1	Allium-derived PTSO	Hindgut	U515 x E786	N709	GCTACGCT	S506	ACTGCATA
AE.1.13.F	T.1	Allium-derived PTSO	Foregut	U515 x E786	N709	GCTACGCT	S507	AAGGAGTA
AE.1.13.H	T.1	Allium-derived PTSO	Hindgut	U515 x E786	N709	GCTACGCT	S508	CTAAGCCT
AE.1.14.F	T.1	Allium-derived PTSO	Foregut	U515 x E786	N710	CGAGGCTG	S501	TAGATCGC
AE.1.14.H	T.1	Allium-derived PTSO	Hindgut	U515 x E786	N710	CGAGGCTG	S502	CTCTCTAT
AE.1.15.F	T.1	Allium-derived PTSO	Foregut	U515 x E786	N710	CGAGGCTG	S503	TATCCTCT
AE.1.15.H	T.1	Allium-derived PTSO	Hindgut	U515 x E786	N710	CGAGGCTG	S504	AGAGTAGA
AE.1.16.F	T.1	Allium-derived PTSO	Foregut	U515 x E786	N710	CGAGGCTG	S505	GTAAGGAG
AE.1.16.H	T.1	Allium-derived PTSO	Hindgut	U515 x E786	N710	CGAGGCTG	S506	ACTGCATA
AE.1.17.F	T.1	Allium-derived PTSO	Foregut	U515 x E786	N710	CGAGGCTG	S507	AAGGAGTA
AE.1.17.H	T.1	Allium-derived PTSO	Hindgut	U515 x E786	N704	TCCTGAGC	S501	TAGATCGC
AE.1.18.F	T.1	Allium-derived PTSO	Foregut	U515 x E786	N704	TCCTGAGC	S502	CTCTCTAT
AE.1.18.H	T.1	Allium-derived PTSO	Hindgut	U515 x E786	N707	CTCTCTAC	S506	ACTGCATA
AE.1.19.F	T.1	Allium-derived PTSO	Foregut	U515 x E786	N708	CAGAGAGG	S504	AGAGTAGA
AE.1.19.H	T.1	Allium-derived PTSO	Hindgut	U515 x E786	N710	CGAGGCTG	S508	CTAAGCCT
AE.1.20.F	T.1	Allium-derived PTSO	Foregut	U515 x E786	N711	AAGAGGCA	S501	TAGATCGC
AE.1.20.H	T.1	Allium-derived PTSO	Hindgut	U515 x E786	N711	AAGAGGCA	S502	CTCTCTAT
AE.2.1.F	T.2	Allium-derived PTSO	Foregut	U515 x E786	N711	AAGAGGCA	S503	TATCCTCT
AE.2.1.H	T.2	Allium-derived PTSO	Hindgut	U515 x E786	N711	AAGAGGCA	S504	AGAGTAGA
AE.2.2.F	T.2	Allium-derived PTSO	Foregut	U515 x E786	N711	AAGAGGCA	S505	GTAAGGAG
AE.2.2.H	T.2	Allium-derived PTSO	Hindgut	U515 x E786	N711	AAGAGGCA	S506	ACTGCATA
AE.2.3.F	T.2	Allium-derived PTSO	Foregut	U515 x E786	N711	AAGAGGCA	S507	AAGGAGTA
AE.2.3.H	T.2	Allium-derived PTSO	Hindgut	U515 x E786	N711	AAGAGGCA	S508	CTAAGCCT
AE.2.4.F	T.2	Allium-derived PTSO	Foregut	U515 x E786	N712	GTAGAGGA	S501	TAGATCGC
AE.2.4.H	T.2	Allium-derived PTSO	Hindgut	U515 x E786	N712	GTAGAGGA	S502	CTCTCTAT
AE.2.5.F	T.2	Allium-derived PTSO	Foregut	U515 x E786	N712	GTAGAGGA	S503	TATCCTCT
AE.2.5.H	T.2	Allium-derived PTSO	Hindgut	U515 x E786	N712	GTAGAGGA	S504	AGAGTAGA
AE.2.6.F	T.2	Allium-derived PTSO	Foregut	U515 x E786	N712	GTAGAGGA	S505	GTAAGGAG
AE.2.6.H	T.2	Allium-derived PTSO	Hindgut	U515_bar2 x E786	N706	TAGGCATG	S508	CTAAGCCT
AE.2.7.F	T.2	Allium-derived PTSO	Foregut	U515_bar2 x E786	N707	CTCTCTAC	S501	TAGATCGC
AE.2.7.H	T.2	Allium-derived PTSO	Hindgut	U515 x E786	N704	TCCTGAGC	S507	AAGGAGTA
AE.2.8.F	T.2	Allium-derived PTSO	Foregut	U515_bar2 x E786	N707	CTCTCTAC	S502	CTCTCTAT
AE.2.8.H	T.2	Allium-derived PTSO	Hindgut	U515_bar2 x E786	N707	CTCTCTAC	S503	TATCCTCT
AE.2.9.F	T.2	Allium-derived PTSO	Foregut	U515_bar2 x E786	N707	CTCTCTAC	S504	AGAGTAGA
AE.2.9.H	T.2	Allium-derived PTSO	Hindgut	U515 x E786	N705	GGACTCCT	S501	TAGATCGC
AE.2.10.F	T.2	Allium-derived PTSO	Foregut	U515 x E786	N705	GGACTCCT	S502	CTCTCTAT
AE.2.10.H	T.2	Allium-derived PTSO	Hindgut	U515_bar2 x E786	N707	CTCTCTAC	S505	GTAAGGAG
AE.2.11.F	T.2	Allium-derived PTSO	Foregut	U515_bar2 x E786	N707	CTCTCTAC	S506	ACTGCATA
AE.2.11.H	T.2	Allium-derived PTSO	Hindgut	U515_bar2 x E786	N707	CTCTCTAC	S507	AAGGAGTA
AE.2.12.F	T.2	Allium-derived PTSO	Foregut	U515_bar2 x E786	N709	GCTACGCT	S501	TAGATCGC
AE.2.12.F2	T.2	Allium-derived PTSO	Foregut	U515_bar2 x E786	N710	CGAGGCTG	S507	AAGGAGTA
AE.2.12.H	T.2	Allium-derived PTSO	Hindgut	U515_bar2 x E786	N707	CTCTCTAC	S508	CTAAGCCT
AE.2.13.F	T.2	Allium-derived PTSO	Foregut	U515_bar2 x E786	N708	CAGAGAGG	S501	TAGATCGC
AE.2.13.H	T.2	Allium-derived PTSO	Hindgut	U515_bar2 x E786	N708	CAGAGAGG	S502	CTCTCTAT
AE.2.14.F	T.2	Allium-derived PTSO	Foregut	U515_bar2 x E786	N708	CAGAGAGG	S503	TATCCTCT
AE.2.14.H	T.2	Allium-derived PTSO	Hindgut	U515_bar2 x E786	N708	CAGAGAGG	S504	AGAGTAGA
AE.2.15.F	T.2	Allium-derived PTSO	Foregut	U515_bar2 x E786	N708	CAGAGAGG	S505	GTAAGGAG
AE.2.15.H	T.2	Allium-derived PTSO	Hindgut	U515_bar2 x E786	N708	CAGAGAGG	S506	ACTGCATA
AE.2.16.F	T.2	Allium-derived PTSO	Foregut	U515_bar2 x E786	N708	CAGAGAGG	S507	AAGGAGTA
AE.2.16.H	T.2	Allium-derived PTSO	Hindgut	U515_bar2 x E786	N708	CAGAGAGG	S508	CTAAGCCT
AE.2.17.F	T.2	Allium-derived PTSO	Foregut	U515_bar2 x E786	N709	GCTACGCT	S501	TAGATCGC
AE.2.18.F	T.2	Allium-derived PTSO	Foregut	U515_bar2 x E786	N709	GCTACGCT	S502	CTCTCTAT
AE.2.18.H	T.2	Allium-derived PTSO	Hindgut	U515 x E786	N706	TAGGCATG	S506	ACTGCATA
AE.2.18.H2	T.2	Allium-derived PTSO	Hindgut	U515_bar2 x E786	N710	CGAGGCTG	S508	CTAAGCCT
AE.2.19.F	T.2	Allium-derived PTSO	Foregut	U515_bar2 x E786	N709	GCTACGCT	S503	TATCCTCT
AE.2.19.H	T.2	Allium-derived PTSO	Hindgut	U515 x E786	N704	TCCTGAGC	S503	TATCCTCT
AE.2.20.F	T.2	Allium-derived PTSO	Foregut	U515 x E786	N704	TCCTGAGC	S504	AGAGTAGA
AE.2.20.H	T.2	Allium-derived PTSO	Hindgut	U515 x E786	N704	TCCTGAGC	S505	GTAAGGAG
AE.3.1.F	T.3	Allium-derived PTSO	Foregut	U515_bar2 x E786	N710	CGAGGCTG	S501	TAGATCGC
AE.3.1.F2	T.3	Allium-derived PTSO	Foregut	U515_bar2 x E786	N711	AAGAGGCA	S501	TAGATCGC
AE.3.1.H	T.3	Allium-derived PTSO	Hindgut	U515_bar2 x E786	N709	GCTACGCT	S504	AGAGTAGA
AE.3.2.F	T.3	Allium-derived PTSO	Foregut	U515_bar2 x E786	N709	GCTACGCT	S505	GTAAGGAG
AE.3.2.H	T.3	Allium-derived PTSO	Hindgut	U515_bar2 x E786	N710	CGAGGCTG	S508	CTAAGCCT
AE.3.3.F	T.3	Allium-derived PTSO	Foregut	U515_bar2 x E786	N711	AAGAGGCA	S501	TAGATCGC
AE.3.3.F2	T.3	Allium-derived PTSO	Foregut	U515_bar2 x E786	N711	AAGAGGCA	S502	CTCTCTAT
AE.3.4.F	T.3	Allium-derived PTSO	Foregut	U515_bar2 x E786	N711	AAGAGGCA	S505	GTAAGGAG
AE.3.4.F2	T.3	Allium-derived PTSO	Foregut	U515_bar2 x E786	N711	AAGAGGCA	S503	TATCCTCT
AE.3.4.H	T.3	Allium-derived PTSO	Hindgut	U515_bar2 x E786	N711	AAGAGGCA	S508	CTAAGCCT
AE.3.4.H2	T.3	Allium-derived PTSO	Hindgut	U515_bar2 x E786	N711	AAGAGGCA	S504	AGAGTAGA
AE.3.5.F	T.3	Allium-derived PTSO	Foregut	U515_bar2 x E786	N712	GTAGAGGA	S501	TAGATCGC
AE.3.5.F2	T.3	Allium-derived PTSO	Foregut	U515_bar2 x E786	N711	AAGAGGCA	S505	GTAAGGAG
AE.3.6.F	T.3	Allium-derived PTSO	Foregut	U515_bar2 x E786	N712	GTAGAGGA	S503	TATCCTCT
AE.3.6.F2	T.3	Allium-derived PTSO	Foregut	U515_bar2 x E786	N711	AAGAGGCA	S506	ACTGCATA
AE.3.6.H	T.3	Allium-derived PTSO	Hindgut	U515_bar2 x E786	N712	GTAGAGGA	S506	ACTGCATA
AE.3.7.F	T.3	Allium-derived PTSO	Foregut	U515 x E786	N704	TCCTGAGC	S506	ACTGCATA
AE.3.7.H	T.3	Allium-derived PTSO	Hindgut	U515 x E786	N704	TCCTGAGC	S507	AAGGAGTA
AE.3.8.F	T.3	Allium-derived PTSO	Foregut	U515 x E786	N704	TCCTGAGC	S508	CTAAGCCT
AE.3.8.H	T.3	Allium-derived PTSO	Hindgut	U515 x E786	N705	GGACTCCT	S501	TAGATCGC
AE.3.9.F	T.3	Allium-derived PTSO	Foregut	U515 x E786	N705	GGACTCCT	S502	CTCTCTAT
AE.3.9.H	T.3	Allium-derived PTSO	Hindgut	U515 x E786	N705	GGACTCCT	S503	TATCCTCT
AE.3.10.F	T.3	Allium-derived PTSO	Foregut	U515 x E786	N705	GGACTCCT	S504	AGAGTAGA
AE.3.10.H	T.3	Allium-derived PTSO	Hindgut	U515 x E786	N705	GGACTCCT	S505	GTAAGGAG
AE.3.11.F	T.3	Allium-derived PTSO	Foregut	U515 x E786	N705	GGACTCCT	S506	ACTGCATA
AE.3.11.H	T.3	Allium-derived PTSO	Hindgut	U515 x E786	N705	GGACTCCT	S507	AAGGAGTA
AE.3.12.F	T.3	Allium-derived PTSO	Foregut	U515 x E786	N705	GGACTCCT	S508	CTAAGCCT
AE.3.12.H	T.3	Allium-derived PTSO	Hindgut	U515 x E786	N706	TAGGCATG	S501	TAGATCGC
AE.3.13.F	T.3	Allium-derived PTSO	Foregut	U515 x E786	N706	TAGGCATG	S502	CTCTCTAT
AE.3.13.H	T.3	Allium-derived PTSO	Hindgut	U515 x E786	N706	TAGGCATG	S503	TATCCTCT
AE.3.14.F	T.3	Allium-derived PTSO	Foregut	U515 x E786	N706	TAGGCATG	S504	AGAGTAGA
AE.3.14.H	T.3	Allium-derived PTSO	Hindgut	U515 x E786	N706	TAGGCATG	S505	GTAAGGAG
AE.3.15.F	T.3	Allium-derived PTSO	Foregut	U515 x E786	N710	CGAGGCTG	S501	TAGATCGC
AE.3.15.F2	T.3	Allium-derived PTSO	Foregut	U515_bar2 x E786	N711	AAGAGGCA	S507	AAGGAGTA
AE.3.15.H	T.3	Allium-derived PTSO	Hindgut	U515 x E786	N710	CGAGGCTG	S504	AGAGTAGA
AE.3.16.F	T.3	Allium-derived PTSO	Foregut	U515 x E786	N710	CGAGGCTG	S505	GTAAGGAG
AE.3.16.H	T.3	Allium-derived PTSO	Hindgut	U515 x E786	N710	CGAGGCTG	S508	CTAAGCCT
AE.3.16.H2	T.3	Allium-derived PTSO	Hindgut	U515_bar2 x E786	N711	AAGAGGCA	S508	CTAAGCCT
AE.3.17.F	T.3	Allium-derived PTSO	Foregut	U515 x E786	N711	AAGAGGCA	S501	TAGATCGC
AE.3.17.F2	T.3	Allium-derived PTSO	Foregut	U515_bar2 x E786	N712	GTAGAGGA	S501	TAGATCGC
AE.3.17.H	T.3	Allium-derived PTSO	Hindgut	U515 x E786	N711	AAGAGGCA	S504	AGAGTAGA
AE.3.18.H	T.3	Allium-derived PTSO	Hindgut	U515 x E786	N711	AAGAGGCA	S508	CTAAGCCT
AE.3.19.H	T.3	Allium-derived PTSO	Hindgut	U515 x E786	N712	GTAGAGGA	S504	AGAGTAGA
AE.3.20.H	T.3	Allium-derived PTSO	Hindgut	U515_bar2 x E786	N709	GCTACGCT	S506	ACTGCATA
